# Supplementary material for: Reaction controlled growth with formic acid for high-quality Cs3Cu2I5 single crystals
Source: Royal Society of Chemistry journal article supplement (doi:10.1039/d3ce00594a), 2023-01-01
Supplement: d3ce00594a1.pdf [file d3ce00594a1.pdf]

# The Reaction Controlled Growth with Formic Acid for High-Quality Cs<sub>3</sub>Cu<sub>2</sub>I<sub>5</sub> Single Crystal

*Jianming Lai<sup>†, ‡</sup>, Qiutao Pan<sup>†</sup>, Wenzhen Wang<sup>\*, †, ‡</sup>, Shaohan Wang<sup>⊥</sup>, Ziyi Lai<sup>†</sup>, Xiaoxi Feng<sup>†</sup>, Jing Sun<sup>†</sup>, Huanzhen Qi<sup>†</sup>, Feng Hong<sup>§</sup>, Zifa Zhang<sup>§</sup>, Fei Xu<sup>§</sup>, Junfeng Chen<sup>⊥</sup>, Yan Zhu<sup>#</sup>, Juan Qin<sup>†</sup>, Hui Zhang<sup>†</sup>, Run Xu<sup>\*, †, ‡</sup>, Linjun Wang<sup>†, ‡</sup>*

<sup>†</sup>School of Materials Science and Engineering, Shanghai University, 333 Nanchen Road, Shanghai 200444, China

<sup>‡</sup>Zhejiang Institute of Advanced Materials, SHU, 2189 Jiashan Street, Jiashan 314113, China

<sup>⊥</sup>Key Laboratory of Transparent Opto-functional Inorganic Materials, Chinese Academy of Sciences, Shanghai Institute of Ceramics, Chinese Academy of Sciences, Shanghai 201899, China

<sup>#</sup>Shanghai Technical Institute of Electronics & Information, Shanghai 201411, China

<sup>§</sup>SHU-Solar E R&D Lab, Department of Physics, College of Sciences, Shanghai Key Laboratory of High Temperature Superconductors, Shanghai University, 99 Shangda Road, Shanghai 200444, China

## Corresponding Author

Email: wzwang@t.shu.edu.cn; runxu@shu.edu.cn

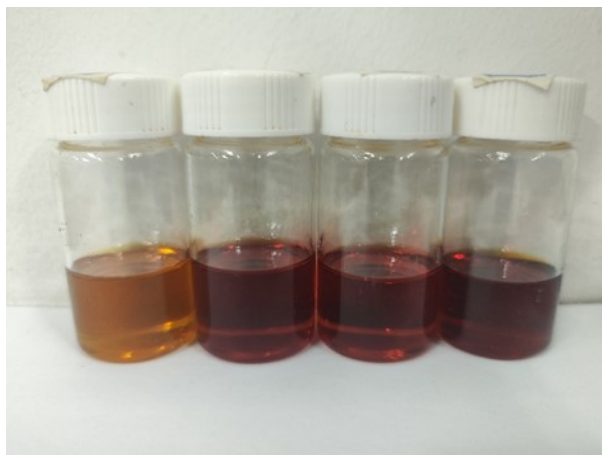

**Figure S1.** Photographs of precursor solutions with different concentrations of formic acid added (0%, 2.5%, 5%, 10%).

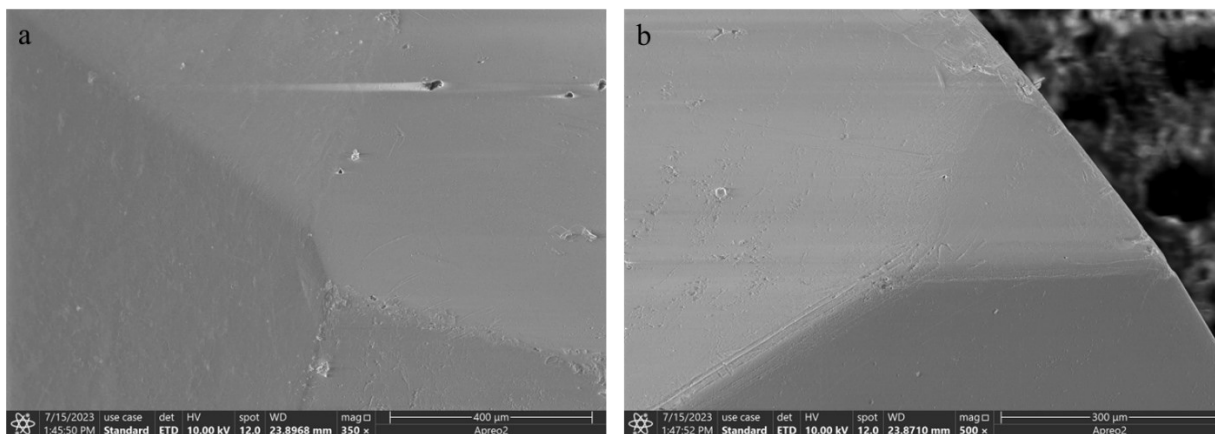

**Figure S2.** Scanning electron microscopy (SEM) images of Cs<sub>3</sub>Cu<sub>2</sub>I<sub>5</sub>.

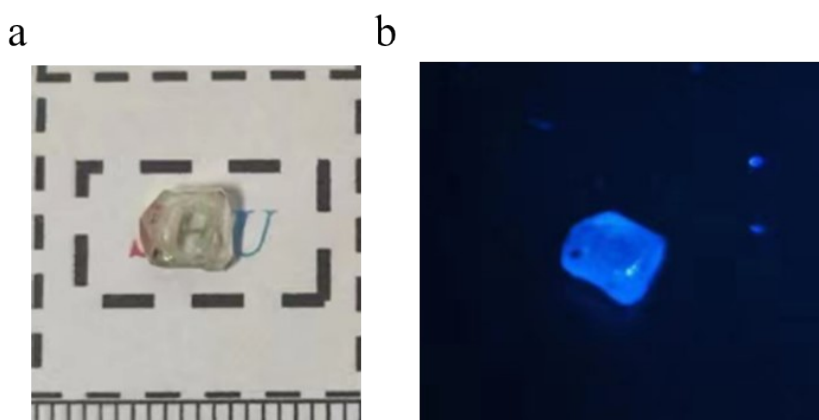

**Figure S3.** Photographs of the Cs<sub>3</sub>Cu<sub>2</sub>I<sub>5</sub> single crystal grown without formic acid. a) Under natural light. b) Under 365 nm UV light irradiation.

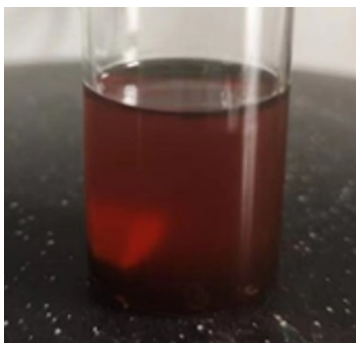

**Figure S4.** Photographs of precursor solutions without formic acid after two days.

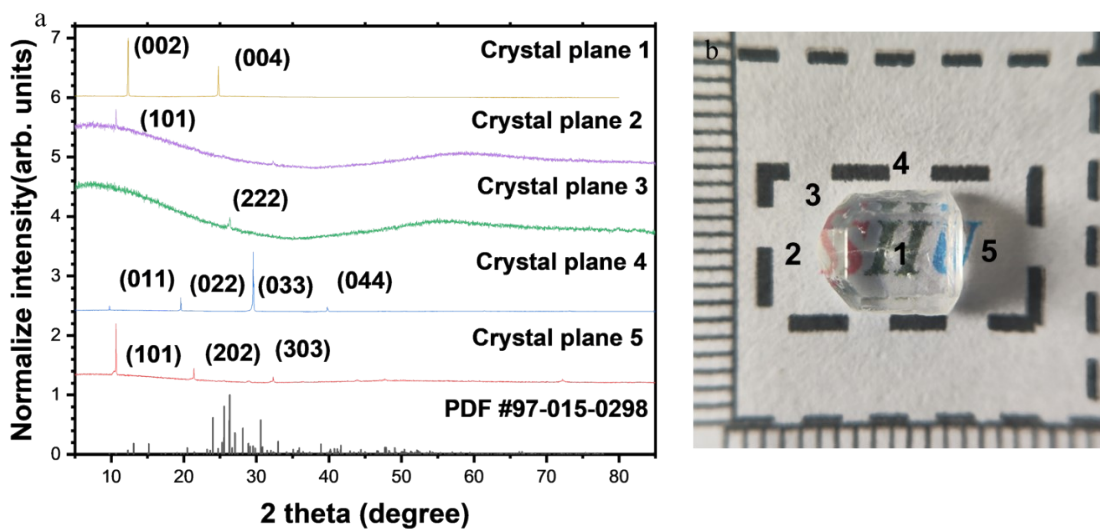

**Figure S5.** a) X-ray diffraction curve of the  $\text{Cs}_3\text{Cu}_2\text{I}_5$  Single crystal with different surface plane. b) Photograph of the  $\text{Cs}_3\text{Cu}_2\text{I}_5$  Single crystal.

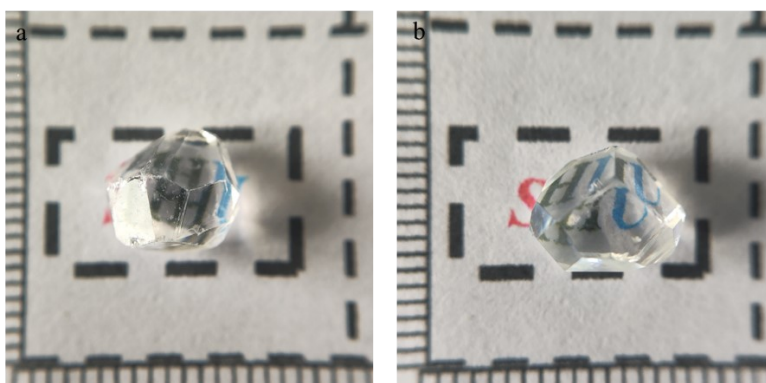

**Figure S6.** Photographs of the  $\text{Cs}_3\text{Cu}_2\text{I}_5$  single crystals.

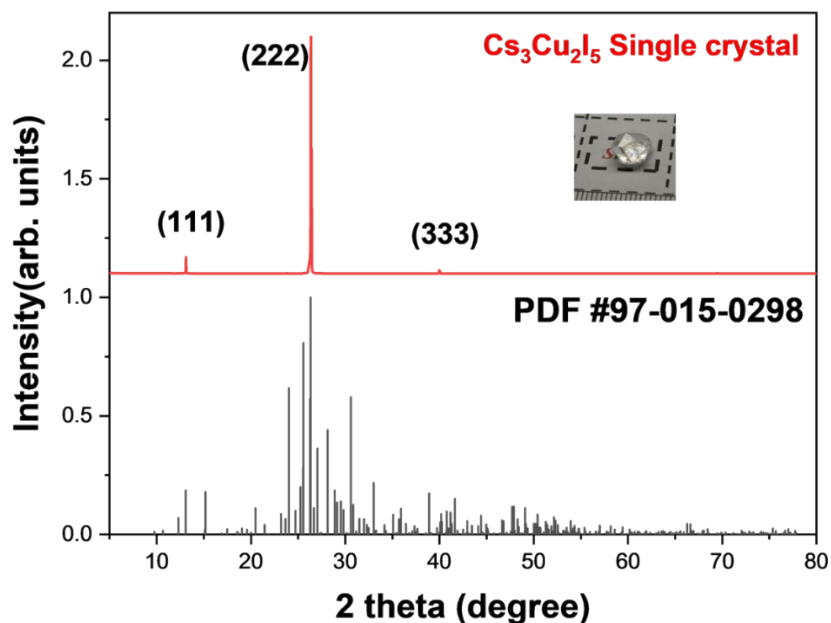

Figure S7. X-ray diffraction curve of a  $\text{Cs}_3\text{Cu}_2\text{I}_5$  Single crystal with a (111) surface plane.

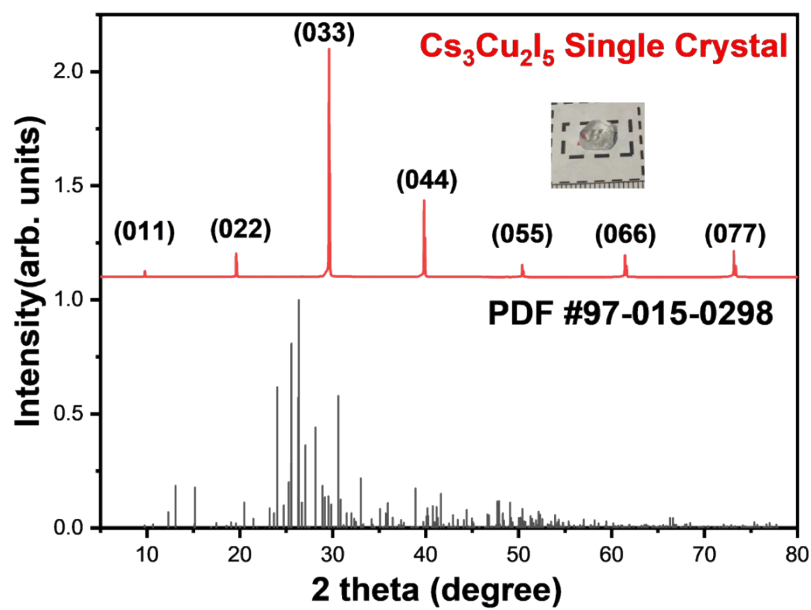

Figure S8. X-ray diffraction curve of a  $\text{Cs}_3\text{Cu}_2\text{I}_5$  Single crystal with a (011) surface plane.

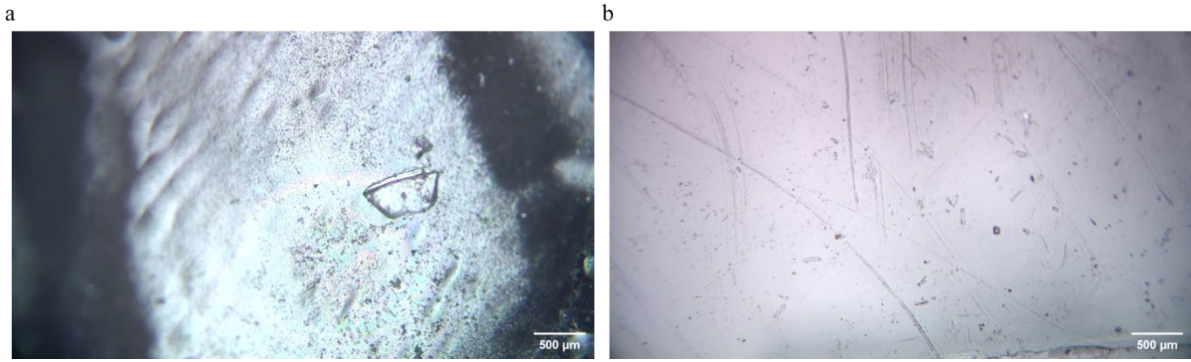

**Figure S9.** Optical images of the  $\text{Cs}_3\text{Cu}_2\text{I}_5$  single crystals grown a) without formic acid. b) with formic acid.

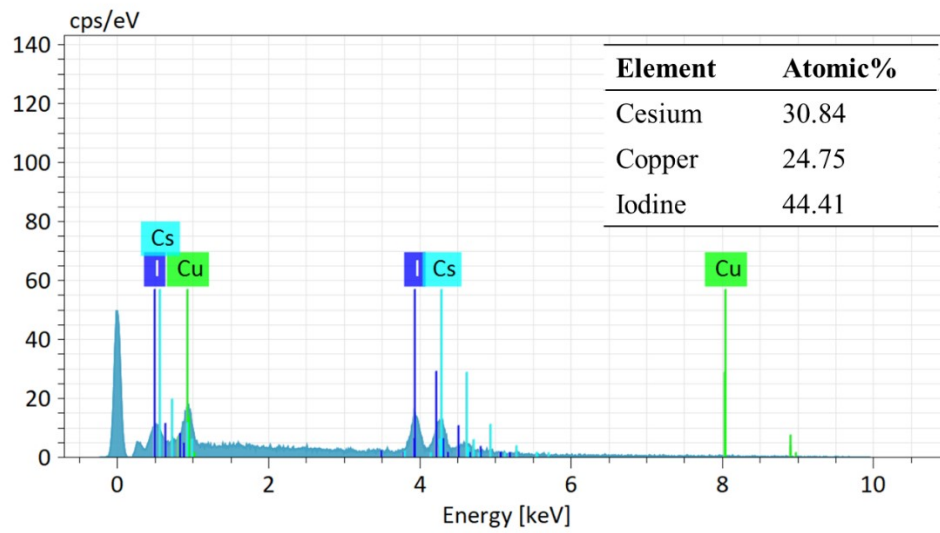

**Figure S10.** EDX spectrum analysis results of  $\text{Cs}_3\text{Cu}_2\text{I}_5$ .

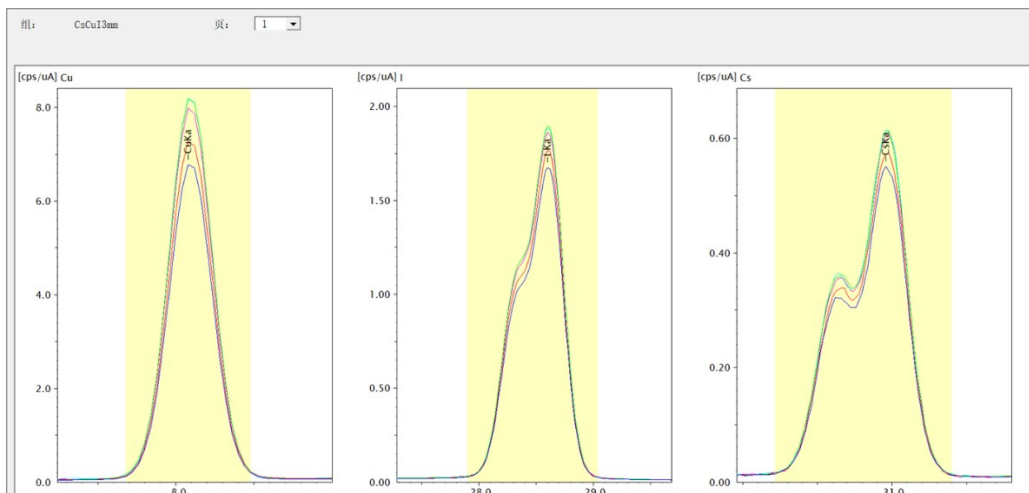

**Figure S11.** X-ray fluorescence (XRF) results of  $\text{Cs}_3\text{Cu}_2\text{I}_5$ .

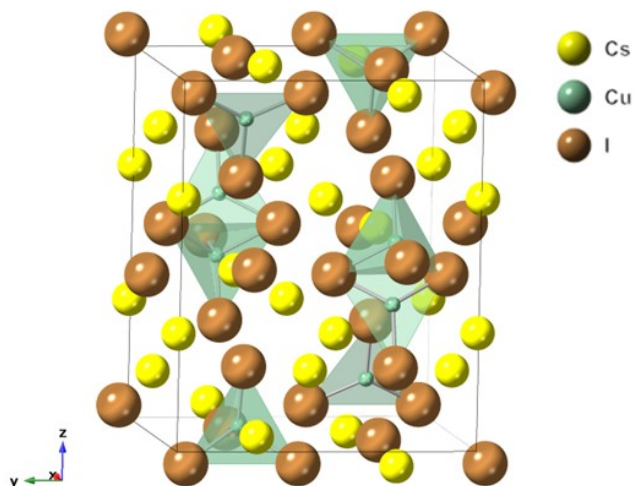

**Figure S12.** Crystal structure of Cs<sub>3</sub>Cu<sub>2</sub>I<sub>5</sub>.

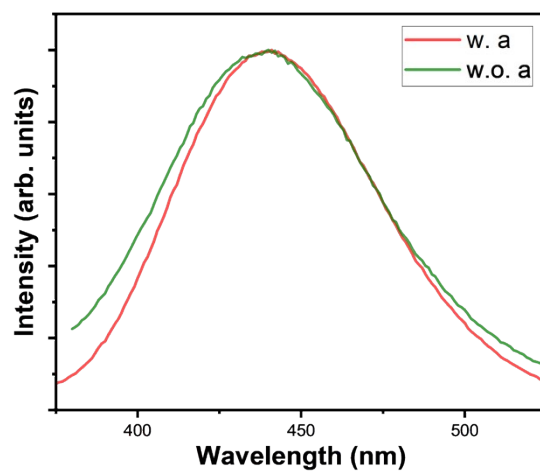

**Figure S13.** The PL spectra of the Cs<sub>3</sub>Cu<sub>2</sub>I<sub>5</sub> single crystals grown with and without formic acid.

**Table S1.** Summary of Cs<sub>3</sub>Cu<sub>2</sub>I<sub>5</sub> Single crystal scintillator performance.

| Growth Method                       | Tl doped | PL decay time (ns)      | Energy resolution                  | Light yield (photons/MeV) | Afterglow (ms) | Ref       |
|-------------------------------------|----------|-------------------------|------------------------------------|---------------------------|----------------|-----------|
| Bridgman                            | No       | 968                     | 3.6%<br>@662KeV                    | 25000                     | 10 (0.03%)     | 1         |
| Bridgman                            | Yes      | 2000                    | 3.4%<br>@662KeV                    | 87000                     | 10 (0.17%)     | 2         |
| Bridgman                            | No       | 157 (12%)<br>956 (87%)  | 7.7 ± 0.3%<br>@662KeV              | 18 000 ± 2000             | -              | 3         |
|                                     | Yes      | 304 (15%)<br>893 (83%)  | 4.5%<br>@662KeV                    |                           | 51000          |           |
| Bridgman                            | No       | 1000                    | 4.4%<br>@662KeV                    | 41,500                    | -              | 4         |
|                                     | Yes      | 720                     | 3.3%<br>@662KeV                    | 98200                     | -              |           |
| Inverse Temperature Crystallization | No       | 134 (33%)<br>1034 (67%) | 9.1%<br>@662KeV                    | -                         | -              | 5         |
| Solution Temperature Lowering       | No       | 1034                    | 7.8%<br>@511KeV<br>4.4%<br>@662KeV | 35000                     | 15 (<0.1%)     | 6         |
| Inverse Temperature Crystallization | No       | 1381                    | 7.1%<br>@511KeV                    | 39000                     | -              | This work |

## REFERENCES

- (1) Cheng, S.; Beitlerova, A.; Kucerkova, R.; Nikl, M.; Ren, G.; Wu, Y., Zero - Dimensional Cs<sub>3</sub>Cu<sub>2</sub>I<sub>5</sub> Perovskite Single Crystal as Sensitive X - Ray and  $\gamma$  - Ray Scintillator. *Phys. Status Solidi RRL* **2020**, *14*, 2000374.
- (2) Cheng, S.; Nikl, M.; Beitlerova, A.; Kucerkova, R.; Du, X.; Niu, G.; Jia, Y.; Tang, J.; Ren, G.; Wu, Y., Ultrabright and Highly Efficient All - Inorganic Zero - Dimensional Perovskite Scintillators. *Adv. Opt. Mater.* **2021**, *9*, 2100460.
- (3) Yuan, D., Air-stable bulk halide single-crystal scintillator Cs<sub>3</sub>Cu<sub>2</sub>I<sub>5</sub> by melt growth: intrinsic and Tl doped with high light yield. *ACS applied materials & interfaces* **2020**, *12*, 38333-38340.

- (4) Stand, L.; Rutstrom, D.; Koschan, M.; Du, M.-H.; Melcher, C.; Shirwadkar, U.; Glodo, J.; Van Loef, E.; Shah, K.; Zhuravleva, M., Crystal growth and scintillation properties of pure and Tl-doped Cs<sub>3</sub>Cu<sub>2</sub>I<sub>5</sub>. *Nucl. Instrum. Methods Phys. Res., Sect. A* **2021**, *991*, 164963.
- (5) Xu, Q.; Wang, J.; Zhang, Q.; Ouyang, X.; Ye, M.; Xie, W.; Yan, X.; Li, D.; Ouyang, X.; Tang, X., Solution-processed lead-free bulk 0D Cs<sub>3</sub>Cu<sub>2</sub>I<sub>5</sub> single crystal for indirect gamma-ray spectroscopy application. *Photonics Research* **2021**, *9*, 351-356.
- (6) Yao, Q.; Li, J.; Li, X.; Zheng, X.; Wang, Z.; Tao, X., High - Quality Cs<sub>3</sub>Cu<sub>2</sub>I<sub>5</sub> Single - Crystal is a Fast - Decaying Scintillator. *Adv. Opt. Mater.* **2022**, *10*, 2201161.
